# Supplementary material
Source: MDPI journal article supplement (https://www.mdpi.com/2673-7264/3/4/33)
Supplement: s1 [file s1]

## SUPPLEMENTARY INFORMATION

# Enthalpy of Formation of the Nitrogen-Rich Salt Guanidinium 5,5'-Azotetrazolate (GZT) and a Simple Approach for Estimating the Enthalpy of Formation of Energetic C, H, N, O Salts

Ana L. R. Silva <sup>1,\*</sup>, Gastón P. León <sup>1</sup>, Maria D. M. C. Ribeiro da Silva <sup>1</sup>, Thomas M. Klapötke <sup>2,\*</sup>  
and Jelena Reinhardt <sup>2</sup>

<sup>1</sup> Centro de Investigação em Química (CIQUP), Institute of Molecular Sciences (IMS),  
Department of Chemistry and Biochemistry, Faculty of Sciences of University of Porto (FCUP),  
Rua do Campo Alegre, P-4169-007 Porto, Portugal; gaston.leon@fc.up.pt (G.P.L.);  
mdsilva@fc.up.pt (M.D.R.S.)

<sup>2</sup> Department of Chemistry, Inorganic Chemistry, Chair of Small Molecule and Energetic Materials Research, LMU  
Munich, Butenandtstraße 5-13, 81377 Munich, Germany; [elrech@cup.uni-muenchen.de](mailto:elrech@cup.uni-muenchen.de) (J.R.)

\* Correspondence: [analuisa.rs@fc.up.pt](mailto:analuisa.rs@fc.up.pt) (A.L.R.S.); [tmk@cup.uni-muenchen.de](mailto:tmk@cup.uni-muenchen.de) (T.M.K.)

This supplementary information includes:

- Data of all the combustion calorimetry experiments of guanidinium 5,5'-azotetrazolate (Table S1).
- Data of computational results on 1:1 salts at CBS-4M level of theory (Table S2)
- Data of computational results on 1:1 salts at CBS-QB3 level of theory (Table S3)
- Data of computational results on 1:1 adducts at CBS-4M level of theory (Table S4)
- Data of computational results on 1:1 adducts at CBS-QB3 level of theory (Table S5)
- Data of computational results on 2:1 salts at CBS-4M level of theory (Table S6)
- Data of computational results on 2:1 salts at CBS-QB3 level of theory (Table S7)
- Data of computational results on 2:1 adducts at CBS-4M level of theory (Table S8)
- Data of computational results on 2:1 adducts at CBS-QB3 level of theory (Table S9)

Acronym used throughout this supplementary data:

- GZT for guanidinium 5,5'-azotetrazolate.

#### Combustion calorimetry

- The calibration experiments were development in an oxygen atmosphere at  $p = 3.04$  MPa, with  $1.00\text{ cm}^3$  of deionized water added to the bomb; the energy equivalent of the calorimeter,  $\varepsilon_{\text{cal}}$ , was determined from the combustion of benzoic acid (NIST SRM 39j) having a mass energy of combustion, under standard bomb conditions, of  $-(26434 \pm 3)\text{ J}\cdot\text{g}^{-1}$ . From six calibration experiments  $\varepsilon_{\text{cal}} = -(16002.6 \pm 1.7)\text{ J}\cdot\text{g}^{-1}$ , for an average mass of water added to the calorimeter of  $3119.6\text{ g}$ ; the uncertainty associated is the standard deviation of the mean.
- The samples of compound were ignited in pellet form under the same conditions of the calibration experiments.
- The cotton thread fuse (empirical formula is  $\text{CH}_{1.686}\text{O}_{0.843}$ ) has a standard massic energy of combustion of  $-16240\text{ J g}^{-1}$  [S1].
- n-Hexadecane (Aldrich, mass fraction  $> 0.999$ ), stored under nitrogen, was added to each pellet of studied compound to prevent incomplete combustions; the massic energy of combustion of the sample used, was determined in our laboratory as  $\Delta_c u^\circ = -(47136.7 \pm 2.3)\text{ J}\cdot\text{g}^{-1}$ .
- The ignition energy was determined from the change in potential difference on discharge of a 1400 F condenser across a platinum wire.
- The calorimeter temperature was measured to  $\pm(1 \times 10^{-4})\text{ K}$ , at time intervals of 10 s, with a quartz crystal thermometer (Hewlett-Packard HP 2804 A), interfaced to a computer; the ignition occurs at  $T = (298.150 \pm 0.001)\text{ K}$ .
- Pressure coefficient of specific energy  $(\partial u / \partial p)_T = -0.2\text{ J}\cdot\text{g}^{-1}\cdot\text{MPa}^{-1}$  (typical value for organic compounds [S2])
- The energetic correction for the nitric acid formation,  $\Delta U(\text{HNO}_3)$  was based on  $-59.7\text{ kJ}\cdot\text{mol}^{-1}$  for the molar energy of formation of  $0.1\text{ mol}\cdot\text{dm}^{-3}\text{ HNO}_3(\text{aq})$  from  $\text{N}_2(\text{g})$ ,  $\text{O}_2(\text{g})$ , and  $\text{H}_2\text{O}(\text{l})$  [S3].
- Corrections for carbon formation relied on the standard massic energy of combustion of carbon,  $\Delta_c u^\circ = -32.76\text{ kJ}\cdot\text{g}^{-1}$  [S4].
- Specific density of the studied compound and the cotton thread, at  $T = 298.15\text{ K}$ :  $\rho = 1.538\text{ g}\cdot\text{cm}^{-3}$  for GZT [S5] and  $\rho = 1.50\text{ g}\cdot\text{cm}^{-3}$  for cotton fuse [S6].
- The value of the massic heat capacity, at  $T = 298.15\text{ K}$ , was calculated as  $1.527\text{ J}\cdot\text{K}^{-1}\cdot\text{g}^{-1}$  for GZT using Kopp's rule [S7].

- 
- S1. Coops, J.; Jessup, R.S.; van Nes, K. Calibration of calorimeters for reactions in a bomb at constant volume. In *Experimental Thermochemistry. Measurement of Heats of Reaction*, 1st ed.; Rossini F.D., ed.; Interscience Publishers, Inc., New York, 1956; Volumen 1, pp. 27-58.
- S2. Washburn, E.W. Standard states for bomb calorimetry, *J. Res. Nat. Bur. Stand.*, **1933**, 10, 525.
- S3. Wagman, D.D.; Evans, W.H.; Parker, V.B.; Schumm, R.H.; Halow, I.; Bailey, S.M.; Churney, K.L.; Nuttall, R.L. The NBS tables of chemical thermodynamic properties. Selected values for inorganic and C1 and C2 organic substances in SI units. *J. Phys. Chem. Ref. Data* **1982**, 11, (Suppl.2).
- S4. Cox, J.D.; Wagman, D.D.; Medvedev, V.A. *CODATA key values for thermodynamics*, Hemisphere, New York, 1979.
- S5. Hiskey, M.A.; Goldman, N.; Stine, J. R. High-nitrogen energetic materials derived from azotetrazolate, *J. Energ. Mater.* **1998**, 16, 119-127.
- S6. Hubbard, W.N.; Scott D.W.; Waddington, G. Standard states and corrections for combustions in a bomb at constant volume. In *Experimental Thermochemistry. Measurement of Heats of Reaction*, 1st ed.; Rossini F.D., ed.; Interscience Publishers, Inc., New York, 1956; Volumen 1, pp. 75-128.
- S7. Hurst, J.E.; Harrison, B.K. Estimation of liquid and solid heat capacities using a modified Kopp's rule, *Chem. Eng. Comm.*, **1992**, 112, 21-30.

**Table S1.** Standard ( $p^\circ = 0.1$  MPa) mass energy of combustion of solid guanidinium 5,5'-azotetrazolate, at  $T = 298.15$  K <sup>a</sup>

|                                                                                                    |          |          |          |          |          |          |
|----------------------------------------------------------------------------------------------------|----------|----------|----------|----------|----------|----------|
| $m(\text{cpd})/\text{g}$                                                                           | 0.35343  | 0.38225  | 0.30214  | 0.24884  | 0.25331  | 0.25140  |
| $m(\text{fuse})/\text{g}$                                                                          | 0.00249  | 0.00233  | 0.00212  | 0.00479  | 0.00238  | 0.00252  |
| $m(\text{n-hexadec.})/\text{g}$                                                                    | 0.28255  | 0.30748  | 0.30046  | 0.30752  | 0.25240  | 0.25210  |
| $T_i/\text{K}$                                                                                     | 298.1513 | 298.1507 | 298.1507 | 298.1504 | 298.1505 | 298.1508 |
| $T_f/\text{K}$                                                                                     | 299.3575 | 299.4507 | 299.3662 | 299.3474 | 299.1921 | 299.1933 |
| $\Delta T_{\text{ad}}/\text{K}$                                                                    | 1.13020  | 1.22766  | 1.13986  | 1.11941  | 0.95747  | 0.95580  |
| $\epsilon_i/\text{J}\cdot\text{K}^{-1}$                                                            | 16.81    | 16.91    | 16.77    | 16.71    | 16.31    | 16.31    |
| $\epsilon_f/\text{J}\cdot\text{K}^{-1}$                                                            | 17.79    | 17.99    | 17.79    | 17.73    | 17.16    | 17.15    |
| $-\Delta U(\text{IBP})/\text{J}$                                                                   | 18105.17 | 19667.02 | 18260.02 | 17932.17 | 15337.42 | 15310.98 |
| $\Delta U(\text{HNO}_3)/\text{J}$                                                                  | 72.43    | 72.57    | 66.63    | 62.34    | 55.41    | 60.36    |
| $\Delta U(\text{ign})/\text{J}$                                                                    | 1.06     | 0.81     | 0.97     | 1.14     | 1.01     | 0.69     |
| $\Delta U_{\Sigma}/\text{J}$                                                                       | 6.59     | 7.24     | 6.25     | 5.79     | 5.17     | 5.11     |
| $-\Delta U(\text{n-hexadec.})/\text{J}$                                                            | 13318.52 | 14493.81 | 14162.46 | 14495.69 | 11897.32 | 11883.16 |
| $-\Delta U(\text{fuse})/\text{J}$                                                                  | 40.44    | 37.84    | 34.43    | 77.79    | 38.65    | 40.92    |
| $-\Delta_c u^\circ/(\text{J}\cdot\text{g}^{-1})$                                                   | 13205.42 | 13225.79 | 13206.63 | 13223.60 | 13188.86 | 13211.73 |
| $\langle \Delta_c u^\circ \rangle = -(13210.34 \pm 5.53) \text{ J}\cdot\text{g}^{-1}$ <sup>b</sup> |          |          |          |          |          |          |

$m(\text{cpd})$  is the mass of compound burnt in each experiment;  $m(\text{fuse})$  is the mass of fuse (cotton) used in each experiment;  $m(\text{n-hexadec.})$  is the mass of n-hexadecane used in each experiment;  $T_i$  is the initial temperature rise;  $T_f$  is the final temperature rise;  $\Delta T_{\text{ad}}$  is the corrected temperature rise;  $\epsilon_i$  and  $\epsilon_f$  are the energy equivalents of contents in the initial and final state, respectively;  $\Delta U(\text{IBP})$  is the energy change for the isothermal combustion reaction under actual bomb conditions;  $\Delta U(\text{HNO}_3)$  is the energy correction for the nitric acid formation;  $\Delta U(\text{ign})$  is the electrical energy for ignition;  $\Delta U_{\Sigma}$  is the standard state correction;  $\Delta U(\text{n-hexadec.})$  is the energy of combustion of the n-hexadecane;  $\Delta U(\text{fuse})$  is the energy of combustion of the fuse (cotton);  $\Delta_c u^\circ$  is the standard massic energy of combustion.

<sup>a</sup> All masses were adjusted for buoyancy. <sup>b</sup> Mean value and standard deviation of the mean.

**Table S2.** Computational results on 1:1 salts at CBS-4M level of theory.

| Compound                                                                                     | $\Delta_f H^\circ$ base (kJ·mol <sup>-1</sup> )         | $\Delta_f H^\circ$ acid (kJ·mol <sup>-1</sup> )                                                                        | $\Delta_r H$ (kJ·mol <sup>-1</sup> ) | $\Delta_f H^\circ$ (s) salt (kJ·mol <sup>-1</sup> ) |
|----------------------------------------------------------------------------------------------|---------------------------------------------------------|------------------------------------------------------------------------------------------------------------------------|--------------------------------------|-----------------------------------------------------|
| NH <sub>4</sub> <sup>+</sup> C(NO <sub>2</sub> ) <sub>3</sub> <sup>-</sup>                   | NH <sub>3</sub> (g) = -46.11 <sup>2</sup>               | HC(NO <sub>2</sub> ) <sub>3</sub> (s) = -48.2 <sup>4</sup>                                                             | -145.35                              | -239.70                                             |
| NH <sub>4</sub> <sup>+</sup> N <sub>3</sub> <sup>-</sup>                                     | NH <sub>3</sub> (g) = -46.11 <sup>2</sup>               | HN <sub>3</sub> (l) = +264.0 <sup>2</sup>                                                                              | -145.35                              | +72.54                                              |
| NH <sub>4</sub> <sup>+</sup> HCO <sub>2</sub> <sup>-</sup>                                   | NH <sub>3</sub> (g) = -46.11 <sup>2</sup>               | H <sub>2</sub> CO <sub>2</sub> (l) = -424.72 <sup>2</sup>                                                              | -145.35                              | -616.18                                             |
| NH <sub>4</sub> <sup>+</sup> HCO <sub>3</sub> <sup>-</sup>                                   | NH <sub>3</sub> (g) = -46.11 <sup>2</sup>               | H <sub>2</sub> CO <sub>3</sub> equivalent to<br>CO <sub>2</sub> (ao) + H <sub>2</sub> O (l) = -<br>699.65 <sup>2</sup> | -145.35                              | -891.1                                              |
| NH <sub>4</sub> <sup>+</sup> CH <sub>3</sub> COO <sup>-</sup>                                | NH <sub>3</sub> (g) = -46.11 <sup>2</sup>               | CH <sub>3</sub> COOH (l) = -484.5 <sup>2</sup>                                                                         | -145.35                              | -675.96                                             |
| NH <sub>4</sub> <sup>+</sup> picrate <sup>-</sup>                                            | NH <sub>3</sub> (g) = -46.11 <sup>2</sup>               | picric acid (s) = -217.9 <sup>6</sup>                                                                                  | -145.35                              | -409.36                                             |
| NH <sub>4</sub> <sup>+</sup> 3,5-dinitrobenzoate <sup>-</sup>                                | NH <sub>3</sub> (g) = -46.11 <sup>2</sup>               | 3,5-dinitrobenzoic acid<br>(s) = -432.6 <sup>7</sup>                                                                   | -145.35                              | -624.06                                             |
| NH <sub>4</sub> <sup>+</sup> N(NO <sub>2</sub> ) <sub>2</sub> <sup>-</sup>                   | NH <sub>3</sub> (g) = -46.11 <sup>2</sup>               | HN(NO <sub>2</sub> ) <sub>2</sub> (l) = +54.4 <sup>1</sup>                                                             | -145.35                              | -137.06                                             |
| NH <sub>4</sub> <sup>+</sup> H <sub>2</sub> NCOO <sup>-</sup>                                | NH <sub>3</sub> (g) = -46.11 <sup>2</sup>               | H <sub>2</sub> NCOOH (s) = -547 <sup>1,5</sup>                                                                         | -145.35                              | -738.46                                             |
| NH <sub>4</sub> <sup>+</sup> H <sub>2</sub> NCOO <sup>-</sup>                                | NH <sub>3</sub> (g) = -46.11 <sup>2</sup>               | H <sub>2</sub> NCOOH (s) = -<br>437.7 <sup>9</sup>                                                                     | -145.35                              | -626.16                                             |
| (H <sub>2</sub> N) <sub>3</sub> C <sup>+</sup> picrate <sup>-</sup>                          | guanidine (s) = -56.1 <sup>2</sup>                      | picric acid (s) = -217.9 <sup>6</sup>                                                                                  | -156.8                               | -430.8                                              |
| (H <sub>2</sub> N) <sub>3</sub> C <sup>+</sup> N(NO <sub>2</sub> ) <sub>2</sub> <sup>-</sup> | guanidine (s) = -56.1 <sup>2</sup>                      | HN(NO <sub>2</sub> ) <sub>2</sub> (l) = +54.4 <sup>1</sup>                                                             | -156.8                               | -158.5                                              |
| (H <sub>2</sub> N) <sub>3</sub> C <sup>+</sup> 3,5-dinitrobenzoate <sup>-</sup>              | guanidine (s) = -56.1 <sup>2</sup>                      | 3,5-dinitrobenzoic acid<br>(s) = -432.6 <sup>7</sup>                                                                   | -156.8                               | -645.5                                              |
| AG <sup>+</sup> N(NO <sub>2</sub> ) <sub>2</sub> <sup>-</sup>                                | AG (s) = +58.5 <sup>3</sup>                             | HN(NO <sub>2</sub> ) <sub>2</sub> (l) = +54.4 <sup>1</sup>                                                             | -163.1                               | -50.9                                               |
| TAG <sup>+</sup> N(NO <sub>2</sub> ) <sub>2</sub> <sup>-</sup>                               | TAG (s) = +287.7 <sup>3</sup>                           | HN(NO <sub>2</sub> ) <sub>2</sub> (l) = +54.4 <sup>1</sup>                                                             | -163.8                               | +178.3                                              |
| N <sub>2</sub> H <sub>5</sub> <sup>+</sup> C(NO <sub>2</sub> ) <sub>3</sub> <sup>-</sup>     | N <sub>2</sub> H <sub>4</sub> (l) = +50.63 <sup>2</sup> | HC(NO <sub>2</sub> ) <sub>3</sub> (s) = -48.2 <sup>4</sup>                                                             | -128.1                               | -125.67                                             |
| N <sub>2</sub> H <sub>5</sub> <sup>+</sup> NTO <sup>-</sup>                                  | N <sub>2</sub> H <sub>4</sub> (l) = +50.63 <sup>2</sup> | HNT O (s) = -129.4 <sup>8</sup>                                                                                        | -128.1                               | -206.87                                             |
| N <sub>2</sub> H <sub>5</sub> <sup>+</sup> N(NO <sub>2</sub> ) <sub>2</sub> <sup>-</sup>     | N <sub>2</sub> H <sub>4</sub> (l) = +50.63 <sup>2</sup> | HN(NO <sub>2</sub> ) <sub>2</sub> (l) = +54.4 <sup>1</sup>                                                             | -128.1                               | -23.07                                              |
| N <sub>2</sub> H <sub>5</sub> <sup>+</sup> CH <sub>3</sub> NNO <sub>2</sub> <sup>-</sup>     | N <sub>2</sub> H <sub>4</sub> (l) = +50.63 <sup>2</sup> | CH <sub>3</sub> NHNO <sub>2</sub> (l) = -<br>51.29 <sup>1</sup>                                                        | -128.1                               | -128.76                                             |
| NH <sub>3</sub> OH <sup>+</sup> N(NO <sub>2</sub> ) <sub>2</sub> <sup>-</sup>                | NH <sub>2</sub> OH (s) = -114.8 <sup>2</sup>            | HN(NO <sub>2</sub> ) <sub>2</sub> (l) = +54.4 <sup>1</sup>                                                             | -78.2                                | -138.6                                              |

<sup>1</sup>Value for  $\Delta_{\text{sub,vap}} H_m^\circ$  obtained from RoseBoom®. <sup>2</sup>Value taken from NBS tables. <sup>3</sup>Value taken from Dorofeeva, O.V.; Ryzhova, O.N.; Sinditskii, V.P. Enthalpy of formation of guanidine and its amino and nitro derivatives. *Struct. Chem.* **2015**, *26*, 1629-1640. <sup>4</sup>Value taken from NIST webbook <https://webbook.nist.gov/chemistry/>. <sup>5</sup>Value for  $\Delta_f H_m^\circ$  (g) calculated using CBS-4M. <sup>6</sup>Value taken from Byrd, E.F.C.; Rice, B.M. Improved prediction of heats for formation of energetic materials using quantum mechanical calculations. *J. Phys. Chem. A* **2006**, *110*, 1005-1013. <sup>7</sup>Value for  $\Delta_{\text{sub}} H_m^\circ$  unknown, therefore value of  $\Delta_{\text{sub}} H_m^\circ$  for 2,4-DNBA used from Vecchio, S.; Brunetti, B. Vapor pressures and standard molar enthalpies, entropies, and Gibbs free energies of sublimation of 2,4- and 3,4-dinitrobenzoic acid. *J. Chem. Thermodyn.* **2009**, *41*, 880-887. <sup>8</sup>Value taken from Sinditskii, V. P.; Smirnov, S. P.; Egorshv, V. Y. *Thermal decomposition of NTO: explanation of high activation energy*, Proc. 37<sup>th</sup> Int. Ann. Conf. ICT Karlsruhe, Germany, 2006, pp. 40-1 – 40-16. <sup>9</sup>Value for  $\Delta_f H_m^\circ$  (g) calculated at CBS-4M; value for  $\Delta_{\text{sub,vap}} H_m^\circ = 0$  since at T > -23°C decomposition occurs forming NH<sub>3</sub>(g) and CO<sub>2</sub> (g).

**Table S3.** Computational results on 1:1 salts at CBS-QB3 level of theory.

| Compound                                                                                     | $\Delta_f H^\circ$ base (kJ·mol <sup>-1</sup> )         | $\Delta_f H^\circ$ acid (kJ·mol <sup>-1</sup> )                                                                 | $\Delta_r H^\circ$ (kJ·mol <sup>-1</sup> ) | $\Delta_f H^\circ$ (s) salt (kJ·mol <sup>-1</sup> ) |
|----------------------------------------------------------------------------------------------|---------------------------------------------------------|-----------------------------------------------------------------------------------------------------------------|--------------------------------------------|-----------------------------------------------------|
| NH <sub>4</sub> <sup>+</sup> C(NO <sub>2</sub> ) <sub>3</sub> <sup>-</sup>                   | NH <sub>3</sub> (g) = -46.11 <sup>1</sup>               | HC(NO <sub>2</sub> ) <sub>3</sub> (s) = -48.4 <sup>4</sup>                                                      | -145.35                                    | -239.66                                             |
| NH <sub>4</sub> <sup>+</sup> N <sub>3</sub> <sup>-</sup>                                     | NH <sub>3</sub> (g) = -46.11 <sup>1</sup>               | HN <sub>3</sub> (l) = +273.84 <sup>5</sup>                                                                      | -145.35                                    | +82.38                                              |
| NH <sub>4</sub> <sup>+</sup> HCO <sub>2</sub> <sup>-</sup>                                   | NH <sub>3</sub> (g) = -46.11 <sup>1</sup>               | H <sub>2</sub> CO <sub>2</sub> (l) = -424.72 <sup>1</sup>                                                       | -145.35                                    | -616.18                                             |
| NH <sub>4</sub> <sup>+</sup> HCO <sub>3</sub> <sup>-</sup>                                   | NH <sub>3</sub> (g) = -46.11 <sup>1</sup>               | H <sub>2</sub> CO <sub>3</sub> equivalent to CO <sub>2</sub> (ao) + H <sub>2</sub> O (l) = -699.65 <sup>1</sup> | -145.35                                    | -891.11                                             |
| NH <sub>4</sub> <sup>+</sup> CH <sub>3</sub> COO <sup>-</sup>                                | NH <sub>3</sub> (g) = -46.11 <sup>1</sup>               | CH <sub>3</sub> COOH (l) = -484.5 <sup>1</sup>                                                                  | -145.35                                    | -675.96                                             |
| NH <sub>4</sub> <sup>+</sup> picrate <sup>-</sup>                                            | NH <sub>3</sub> (g) = -46.11 <sup>1</sup>               | picric acid (s) = -217.9 <sup>1,11</sup>                                                                        | -145.35                                    | -409.36                                             |
| NH <sub>4</sub> <sup>+</sup> 3,5-dinitrobenzoate <sup>-</sup>                                | NH <sub>3</sub> (g) = -46.11 <sup>1</sup>               | 3,5-dinitrobenzoic acid (s) = -432.6 <sup>1</sup>                                                               | -145.35                                    | -623.52                                             |
| NH <sub>4</sub> <sup>+</sup> N(NO <sub>2</sub> ) <sub>2</sub> <sup>-</sup>                   | NH <sub>3</sub> (g) = -46.11 <sup>1</sup>               | HN(NO <sub>2</sub> ) <sub>2</sub> (l) = +34.13 <sup>3</sup>                                                     | -145.35                                    | -157.33                                             |
| NH <sub>4</sub> <sup>+</sup> H <sub>2</sub> NCOO <sup>-</sup>                                | NH <sub>3</sub> (g) = -46.11 <sup>1</sup>               | H <sub>2</sub> NCOOH (s) = -550.75 <sup>9</sup>                                                                 | -145.35                                    | -742.21                                             |
| NH <sub>4</sub> <sup>+</sup> H <sub>2</sub> NCOO <sup>-</sup>                                | NH <sub>3</sub> (g) = -46.11 <sup>1</sup>               | H <sub>2</sub> NCOOH (s) = -438.75 <sup>10</sup>                                                                | -145.35                                    | -629.91                                             |
| (H <sub>2</sub> N) <sub>3</sub> C <sup>+</sup> picrate <sup>-</sup>                          | guanidine (s) = -56.1 <sup>1</sup>                      | picric acid (s) = -217.9 <sup>11</sup>                                                                          | -156.8                                     | -430.8                                              |
| (H <sub>2</sub> N) <sub>3</sub> C <sup>+</sup> N(NO <sub>2</sub> ) <sub>2</sub> <sup>-</sup> | guanidine (s) = -56.1 <sup>1</sup>                      | HN(NO <sub>2</sub> ) <sub>2</sub> (l) = +34.13 <sup>3</sup>                                                     | -156.8                                     | -178.77                                             |
| (H <sub>2</sub> N) <sub>3</sub> C <sup>+</sup> 3,5-dinitrobenzoate <sup>-</sup>              | guanidine (s) = -56.1 <sup>1</sup>                      | 3,5-dinitrobenzoic acid (s) = -432.06 <sup>1</sup>                                                              | -156.8                                     | -644.96                                             |
| AG <sup>+</sup> N(NO <sub>2</sub> ) <sub>2</sub> <sup>-</sup>                                | AG (s) = +58.5 <sup>2</sup>                             | HN(NO <sub>2</sub> ) <sub>2</sub> (l) = +34.13 <sup>3</sup>                                                     | -163.1                                     | -70.47                                              |
| TAG <sup>+</sup> N(NO <sub>2</sub> ) <sub>2</sub> <sup>-</sup>                               | TAG (s) = +287.7 <sup>2</sup>                           | HN(NO <sub>2</sub> ) <sub>2</sub> (l) = +34.13 <sup>3</sup>                                                     | -163.8                                     | +158.03                                             |
| N <sub>2</sub> H <sub>5</sub> <sup>+</sup> C(NO <sub>2</sub> ) <sub>3</sub> <sup>-</sup>     | N <sub>2</sub> H <sub>4</sub> (l) = +50.63 <sup>1</sup> | HC(NO <sub>2</sub> ) <sub>3</sub> (s) = -48.2 <sup>4</sup>                                                      | -128.1                                     | -125.67                                             |
| N <sub>2</sub> H <sub>5</sub> <sup>+</sup> NTO <sup>-</sup>                                  | N <sub>2</sub> H <sub>4</sub> (l) = +50.63 <sup>1</sup> | HNTO (s) = -129.4 <sup>7</sup>                                                                                  | -128.1                                     | -206.87                                             |
| N <sub>2</sub> H <sub>5</sub> <sup>+</sup> N(NO <sub>2</sub> ) <sub>2</sub> <sup>-</sup>     | N <sub>2</sub> H <sub>4</sub> (l) = +50.63 <sup>1</sup> | HN(NO <sub>2</sub> ) <sub>2</sub> (l) = +34.13 <sup>3</sup>                                                     | -128.1                                     | -43.34                                              |
| N <sub>2</sub> H <sub>5</sub> <sup>+</sup> CH <sub>3</sub> NNO <sub>2</sub> <sup>-</sup>     | N <sub>2</sub> H <sub>4</sub> (l) = +50.63 <sup>1</sup> | CH <sub>3</sub> NHNO <sub>2</sub> (l) = -61.0 <sup>8</sup>                                                      | -128.1                                     | -138.47                                             |
| NH <sub>3</sub> OH <sup>+</sup> N(NO <sub>2</sub> ) <sub>2</sub> <sup>-</sup>                | NH <sub>2</sub> OH (s) = -114.8 <sup>1</sup>            | HN(NO <sub>2</sub> ) <sub>2</sub> (l) = +34.13 <sup>3</sup>                                                     | -78.2                                      | -158.87                                             |

<sup>1</sup>Value taken from NBS tables. <sup>2</sup>Value taken from Dorofeeva, O.V.; Ryzhova, O.N.; Sinditskii, V.P. Enthalpy of formation of guanidine and its amino and nitro derivatives. *Struct. Chem.* **2015**, *26*, 1629-1640. <sup>3</sup>Value for  $\Delta_f H_m^\circ$ (g) calculated using CBS-QB3; value for  $\Delta_{\text{vap}} H_m^\circ$  obtained from RoseBoom®. <sup>4</sup>Value taken from NIST webbook <https://webbook.nist.gov/chemistry/>. <sup>5</sup>Value for  $\Delta_f H_m^\circ$ (g) calculated using CBS-QB3; value for  $\Delta_{\text{vap}} H_m^\circ$  obtained from RoseBoom®. <sup>6</sup>Stated in NBS tables as being equivalent to CO<sub>2</sub> (g) and H<sub>2</sub>O (l). <sup>7</sup>Value taken from Sinditskii, V. P.; Smirnov, S. P.; Egorchev, V. Y. *Thermal decomposition of NTO: explanation of high activation energy*, Proc. 37<sup>th</sup> Int. Ann. Conf. ICT Karlsruhe, Germany, 2006, pp. 40-1 – 40-16. <sup>8</sup>Value for  $\Delta_f H_m^\circ$ (g) calculated using CBS-QB3 (-9.9 kJ·mol<sup>-1</sup>); value for  $\Delta_{\text{vap}} H_m^\circ$  (51.0 kJ·mol<sup>-1</sup>) obtained from RoseBoom®. <sup>9</sup>Value for  $\Delta_f H_m^\circ$ (g) calculated using CBS-QB3 (-438.45 kJ·mol<sup>-1</sup>); value for  $\Delta_{\text{sub}} H_m^\circ$  (112.3 kJ·mol<sup>-1</sup>) obtained from RoseBoom®. <sup>10</sup>H<sub>2</sub>NCOOH is unstable above -23°C with respect to the formation of NH<sub>3</sub> and CO<sub>2</sub>, both NH<sub>3</sub> and CO<sub>2</sub> are gases under ambient conditions. <sup>11</sup>Value taken from Byrd, E.F.C.; Rice, B.M. Improved prediction of heats for formation of energetic materials using quantum mechanical calculations. *J. Phys. Chem. A* **2006**, *110*, 1005-1013.

**Table S4.** Computational results on 1:1 adducts at CBS-4M level of theory.

| Compound                                                              | $\Delta_{\text{trs}}H^\circ$ base<br>(kJ·mol <sup>-1</sup> ) | $\Delta_{\text{trs}}H^\circ$ acid<br>(kJ·mol <sup>-1</sup> )           | $\Delta_fH^\circ$ (g) Adduct<br>(kJ·mol <sup>-1</sup> ) | $\Delta_fH^\circ$ (s) Adduct<br>(kJ·mol <sup>-1</sup> ) |
|-----------------------------------------------------------------------|--------------------------------------------------------------|------------------------------------------------------------------------|---------------------------------------------------------|---------------------------------------------------------|
| NH <sub>3</sub> •HC(NO <sub>2</sub> ) <sub>3</sub>                    | 0                                                            | $\Delta_{\text{sub}}H^\circ = 45.8^2$                                  | -67.9                                                   | -113.7                                                  |
| NH <sub>3</sub> •HN <sub>3</sub>                                      | 0                                                            | $\Delta_{\text{vap}}H^\circ = 30^{10}$                                 | +232.56                                                 | +202.56                                                 |
| NH <sub>3</sub> •H <sub>2</sub> CO <sub>2</sub>                       | 0                                                            | $\Delta_{\text{vap}}H^\circ = 36.0^2$                                  | -459.3                                                  | -495.3                                                  |
| NH <sub>3</sub> •H <sub>2</sub> CO <sub>3</sub>                       | 0                                                            | $\Delta_{\text{vap}}H^\circ$ H <sub>2</sub> O =<br>43.99 <sup>11</sup> | -696.3                                                  | -740.29                                                 |
| NH <sub>3</sub> •CH <sub>3</sub> COOH                                 | 0                                                            | $\Delta_{\text{vap}}H^\circ = 42.0^2$                                  | -516.97                                                 | -558.97                                                 |
| NH <sub>3</sub> •picric acid                                          | 0                                                            | $\Delta_{\text{sub}}H^\circ = 105.1^5$                                 | -182.91                                                 | -288.01                                                 |
| NH <sub>3</sub> •3,5-dinitrobenzoic acid                              | 0                                                            | $\Delta_{\text{sub}}H^\circ = 134^6$                                   | -437.44                                                 | -571.44                                                 |
| NH <sub>3</sub> •HN(NO <sub>2</sub> ) <sub>2</sub>                    | 0                                                            | $\Delta_{\text{vap}}H^\circ = 63.4^4$                                  | +64.69                                                  | +1.09                                                   |
| NH <sub>3</sub> •H <sub>2</sub> NCOOH                                 | 0                                                            | 0 <sup>8</sup>                                                         | -518.3                                                  | -518.3                                                  |
| NH <sub>3</sub> •H <sub>2</sub> NCOOH                                 | 0                                                            | $\Delta_{\text{sub}}H^\circ = 112.3^9$                                 | -518.3                                                  | -630.6                                                  |
| (H <sub>2</sub> N) <sub>2</sub> CNH•picric acid                       | $\Delta_{\text{sub}}H^\circ = 78.3^1$                        | $\Delta_{\text{sub}}H^\circ = 105.1^5$                                 | -201.4                                                  | -384.8                                                  |
| (H <sub>2</sub> N) <sub>2</sub> CNH•HN(NO <sub>2</sub> ) <sub>2</sub> | $\Delta_{\text{sub}}H^\circ = 78.3^1$                        | $\Delta_{\text{sub}}H^\circ = 63.4^4$                                  | +51.62                                                  | -90.08                                                  |
| (H <sub>2</sub> N) <sub>2</sub> CNH•3,5-dinitrobenzoic acid           | $\Delta_{\text{sub}}H^\circ = 78.3^1$                        | $\Delta_{\text{sub}}H^\circ = 134^6$                                   | -376.2                                                  | -588.5                                                  |
| AG•HN(NO <sub>2</sub> ) <sub>2</sub>                                  | $\Delta_{\text{sub}}H^\circ = 65.4^1$                        | $\Delta_{\text{vap}}H^\circ = 63.4^4$                                  | +146.61                                                 | +17.81                                                  |
| TAG•HN(NO <sub>2</sub> ) <sub>2</sub>                                 | $\Delta_{\text{sub}}H^\circ = 65.4^1$                        | $\Delta_{\text{vap}}H^\circ = 63.4^4$                                  | +405.30                                                 | +263.7                                                  |
| N <sub>2</sub> H <sub>4</sub> •HC(NO <sub>2</sub> ) <sub>3</sub>      | $\Delta_{\text{vap}}H^\circ = 44.5^2$                        | $\Delta_{\text{sub}}H^\circ = 45.8^2$                                  | +83.10                                                  | -7.2                                                    |
| N <sub>2</sub> H <sub>4</sub> •HNT0                                   | $\Delta_{\text{vap}}H^\circ = 44.5^2$                        | $\Delta_{\text{sub}}H^\circ = 110.5^7$                                 | +29.8                                                   | -125.2                                                  |
| N <sub>2</sub> H <sub>4</sub> •HN(NO <sub>2</sub> ) <sub>2</sub>      | $\Delta_{\text{vap}}H^\circ = 44.5^2$                        | $\Delta_{\text{vap}}H^\circ = 63.4^4$                                  | +191.37                                                 | +83.47                                                  |
| N <sub>2</sub> H <sub>4</sub> •CH <sub>3</sub> NHNO <sub>2</sub>      | $\Delta_{\text{vap}}H^\circ = 44.5^2$                        | $\Delta_{\text{vap}}H^\circ = 51.0^4$                                  | +61.32                                                  | -34.18                                                  |
| NH <sub>2</sub> OH•HN(NO <sub>2</sub> ) <sub>2</sub>                  | $\Delta_{\text{sub}}H^\circ = 64.2^2$                        | $\Delta_{\text{vap}}H^\circ = 63.4^4$                                  | +62.93                                                  | -64.67                                                  |

<sup>1</sup>Value taken from Dorofeeva, O.V.; Ryzhova, O.N.; Sinditskii, V.P. Enthalpy of formation of guanidine and its amino and nitro derivatives. *Struct. Chem.* **2015**, *26*, 1629-1640. <sup>2</sup>Value taken from Acree Jr., W.; Chickos, J.S. Enthalpies of Sublimation of Organic and Organometallic Compounds. 1910 - 2001. *J. Phys. Chem. Ref. Data* **2002**, *31*, 537-698. <sup>3</sup>Value taken from NIST webbook <https://webbook.nist.gov/chemistry/>. <sup>4</sup>Value for  $\Delta_{\text{vap}}H_m^\circ$  estimated using RoseBoom<sup>®</sup>. <sup>5</sup>Value taken from Keshavarz, M.H. Improved prediction of heats of sublimation of energetic compounds using their molecular structure. *J. Haz. Mater.* **2010**, *177*, 648-659. <sup>6</sup>Value of  $\Delta_{\text{sub}}H_m^\circ$  for the 2,4-dinitrobenzoic acid isomer used from Vecchio, S.; Brunetti, B. Vapor pressures and standard molar enthalpies, entropies, and Gibbs free energies of sublimation of 2,4- and 3,4-dinitrobenzoic acid. *J. Chem. Thermodyn.* **2009**, *41*, 880-887. <sup>7</sup>Value taken from Sinditskii, V. P.; Smirnov, S. P.; Egorshv, V. Y. *Thermal decomposition of NTO: explanation of high activation energy*, Proc. 37<sup>th</sup> Int. Ann. Conf. ICT Karlsruhe, Germany, 2006, pp. 40-1 – 40-16. <sup>8</sup>Using a value of  $\Delta_{\text{sub}}H_m^\circ = 0$  for H<sub>2</sub>NCOOH since it is unstable above -23°C and both NH<sub>3</sub> and CO<sub>2</sub> are gases at room temperature. <sup>9</sup>Value for  $\Delta_{\text{sub}}H_m^\circ$  estimated using RoseBoom<sup>®</sup>. <sup>10</sup>Argonne National Laboratory Active Thermochemical Tables. <sup>11</sup>Values take from Chickos, J.S.; Acree Jr., W. Enthalpies of Vaporization of Organic and Organometallic Compounds. 1880 - 2002. *J. Phys. Chem. Ref. Data* **2003**, *32*, 519-878.

**Table S5.** Computational results on 1:1 adducts at CBS-QB3 level of theory.

| Compound                                                              | $\Delta_{\text{trs}}H^\circ$ base<br>(kJ·mol <sup>-1</sup> ) | $\Delta_{\text{trs}}H^\circ$ acid<br>(kJ·mol <sup>-1</sup> )          | $\Delta_fH^\circ$ (g) Adduct<br>(kJ·mol <sup>-1</sup> ) | $\Delta_fH^\circ$ (s) Adduct<br>(kJ·mol <sup>-1</sup> ) |
|-----------------------------------------------------------------------|--------------------------------------------------------------|-----------------------------------------------------------------------|---------------------------------------------------------|---------------------------------------------------------|
| NH <sub>3</sub> •HC(NO <sub>2</sub> ) <sub>3</sub>                    | 0                                                            | $\Delta_{\text{sub}}H^\circ = 45.8^2$                                 | -99.15                                                  | -144.95                                                 |
| NH <sub>3</sub> •HN <sub>3</sub>                                      | 0                                                            | $\Delta_{\text{vap}}H^\circ = 30^{10}$                                | +223.7                                                  | +193.7                                                  |
| NH <sub>3</sub> •H <sub>2</sub> CO <sub>2</sub>                       | 0                                                            | $\Delta_{\text{vap}}H^\circ = 36.0^2$                                 | -469                                                    | -505                                                    |
| NH <sub>3</sub> •H <sub>2</sub> CO <sub>3</sub>                       | 0                                                            | $\Delta_{\text{vap}}H^\circ$ H <sub>2</sub> O =<br>43.99 <sup>2</sup> | -699.58                                                 | -743.57                                                 |
| NH <sub>3</sub> •CH <sub>3</sub> COOH                                 | 0                                                            | $\Delta_{\text{vap}}H^\circ = 42.0^2$                                 | -518.12                                                 | -560.12                                                 |
| NH <sub>3</sub> •picric acid                                          | 0                                                            | $\Delta_{\text{sub}}H^\circ = 105.1^5$                                | -219.81                                                 | -324.91                                                 |
| NH <sub>3</sub> •HN(NO <sub>2</sub> ) <sub>2</sub>                    | 0                                                            | $\Delta_{\text{vap}}H^\circ = 63.4^4$                                 | +4.13                                                   | -59.27                                                  |
| NH <sub>3</sub> •H <sub>2</sub> NCOOH                                 | 0                                                            | 0 <sup>8</sup>                                                        | -524.89                                                 | -524.89                                                 |
| NH <sub>3</sub> •H <sub>2</sub> NCOOH                                 | 0                                                            | $\Delta_{\text{sub}}H^\circ = 112.3^9$                                | -524.89                                                 | -637.19                                                 |
| (H <sub>2</sub> N) <sub>2</sub> CNH•HN(NO <sub>2</sub> ) <sub>2</sub> | $\Delta_{\text{sub}}H^\circ = 78.3^1$                        | $\Delta_{\text{sub}}H^\circ = 63.4^4$                                 | +18.31                                                  | -123.39                                                 |
| (H <sub>2</sub> N) <sub>2</sub> CNH•3,5-dinitrobenzoic acid           | $\Delta_{\text{sub}}H^\circ = 78.3^1$                        | $\Delta_{\text{sub}}H^\circ = 134^6$                                  | -407.34                                                 | -619.64                                                 |
| AG•HN(NO <sub>2</sub> ) <sub>2</sub>                                  | $\Delta_{\text{sub}}H^\circ = 65.4^1$                        | $\Delta_{\text{vap}}H^\circ = 63.4^4$                                 | +111.53                                                 | -17.27                                                  |
| TAG•HN(NO <sub>2</sub> ) <sub>2</sub>                                 | $\Delta_{\text{sub}}H^\circ = 65.40^1$                       | $\Delta_{\text{vap}}H^\circ = 63.4^4$                                 | +372.76                                                 | +231.16                                                 |
| N <sub>2</sub> H <sub>4</sub> •HC(NO <sub>2</sub> ) <sub>3</sub>      | $\Delta_{\text{vap}}H^\circ = 44.5^2$                        | $\Delta_{\text{sub}}H^\circ = 45.8^2$                                 | +39.03                                                  | -51                                                     |
| N <sub>2</sub> H <sub>4</sub> •HNT0                                   | $\Delta_{\text{vap}}H^\circ = 44.5^2$                        | $\Delta_{\text{sub}}H^\circ = 110.5^7$                                | +19.99                                                  | -135.01                                                 |
| N <sub>2</sub> H <sub>4</sub> •HN(NO <sub>2</sub> ) <sub>2</sub>      | $\Delta_{\text{vap}}H^\circ = 44.5^2$                        | $\Delta_{\text{vap}}H^\circ = 63.4^4$                                 | +141.70                                                 | +33.8                                                   |
| N <sub>2</sub> H <sub>4</sub> •CH <sub>3</sub> NHNO <sub>2</sub>      | $\Delta_{\text{vap}}H^\circ = 44.5^2$                        | $\Delta_{\text{vap}}H^\circ = 51.0^4$                                 | +47.79                                                  | -47.71                                                  |
| NH <sub>2</sub> OH•HN(NO <sub>2</sub> ) <sub>2</sub>                  | $\Delta_{\text{sub}}H^\circ = 64.2^2$                        | $\Delta_{\text{vap}}H^\circ = 63.4^4$                                 | +23.41                                                  | -104.19                                                 |

<sup>1</sup>Value taken from Dorofeeva, O.V.; Ryzhova, O.N.; Sinditskii, V.P. Enthalpy of formation of guanidine and its amino and nitro derivatives. *Struct. Chem.* **2015**, *26*, 1629-1640. <sup>2</sup>Value taken from Acree Jr., W.; Chickos, J.S. Enthalpies of Sublimation of Organic and Organometallic Compounds. 1910 - 2001. *J. Phys. Chem. Ref. Data* **2002**, *31*, 537-698. <sup>3</sup>Value taken from NIST webbook <https://webbook.nist.gov/chemistry/>. <sup>4</sup>Value for  $\Delta_{\text{vap}}H^\circ_{\text{m}}$  estimated using RoseBoom®. <sup>5</sup>Value taken from Keshavarz, M.H. Improved prediction of heats of sublimation of energetic compounds using their molecular structure. *J. Haz. Mater.* **2010**, *177*, 648-659. <sup>6</sup>Value of  $\Delta_{\text{sub}}H^\circ_{\text{m}}$  for the 2,4-dinitrobenzoic acid isomer used from Vecchio, S.; Brunetti, B. Vapor pressures and standard molar enthalpies, entropies, and Gibbs free energies of sublimation of 2,4- and 3,4-dinitrobenzoic acid. *J. Chem. Thermodyn.* **2009**, *41*, 880-887. <sup>7</sup>Value taken from Sinditskii, V. P.; Smirnov, S. P.; Egorshv, V. Y. *Thermal decomposition of NTO: explanation of high activation energy*, Proc. 37<sup>th</sup> Int. Ann. Conf. ICT Karlsruhe, Germany, 2006, pp. 40-1 – 40-16. <sup>8</sup>Using a value of  $\Delta_{\text{sub}}H^\circ_{\text{m}} = 0$  for H<sub>2</sub>NCOOH since it is unstable above -23°C and both NH<sub>3</sub> and CO<sub>2</sub> are gases at room temperature. <sup>9</sup>Value for  $\Delta_{\text{sub}}H^\circ_{\text{m}}$  estimated using RoseBoom®. <sup>10</sup>Argonne National Laboratory Active Thermochemical Tables.

**Table S6.** Computational results on 2:1 salts at CBS-4M level of theory.

| Compound                                                      | $\Delta_f H^\circ$ base (kJ·mol <sup>-1</sup> )                  | $\Delta_f H^\circ$ acid (kJ·mol <sup>-1</sup> ) | $\Delta_r H$ (kJ·mol <sup>-1</sup> ) | $\Delta_f H^\circ$ (s) salt (kJ·mol <sup>-1</sup> ) |
|---------------------------------------------------------------|------------------------------------------------------------------|-------------------------------------------------|--------------------------------------|-----------------------------------------------------|
| TKX-50                                                        | 2 x NH <sub>2</sub> OH (s)<br>2 x -114.8 <sup>1</sup>            | +542.2 <sup>6</sup>                             | 2 x -78.2                            | +156.2                                              |
| TKX-50                                                        | 2 x NH <sub>2</sub> OH (s)<br>2 x -114.8 <sup>1</sup>            | +554.1 <sup>5</sup>                             | 2 x -78.2                            | +168.1                                              |
| GZT                                                           | 2 x G (s)<br>2 x -56.1 <sup>1</sup>                              | +806.4 <sup>2</sup>                             | 2 x -156.8                           | +380.6                                              |
| (AG) <sub>2</sub> AzT                                         | 2 x AG (s)<br>2 x +58.5 <sup>3</sup>                             | +806.4 <sup>2</sup>                             | 2 x -163.1                           | +597.2                                              |
| (DAG) <sub>2</sub> AzT                                        | 2 x DAG (s)<br>2 x +167.4 <sup>3</sup>                           | +806.4 <sup>2</sup>                             | 2 x 150.6                            | +840                                                |
| (TAG) <sub>2</sub> AzT                                        | 2 x TAG (s)<br>2 x +287.7 <sup>3</sup>                           | +806.4 <sup>2</sup>                             | 2 x -163.8                           | +1054.2                                             |
| (NH <sub>4</sub> ) <sub>2</sub> AzT                           | 2 x NH <sub>3</sub> (g)<br>2 x -46.11 <sup>1</sup>               | +806.4 <sup>2</sup>                             | 2 x -145.35                          | +423.48                                             |
| (N <sub>2</sub> H <sub>5</sub> ) <sub>2</sub> AzT             | 2 x N <sub>2</sub> H <sub>4</sub> (l)<br>2 x +50.63 <sup>1</sup> | +806.4 <sup>2</sup>                             | 2 x -128.1                           | +651.5                                              |
| (G) <sub>2</sub> CO <sub>3</sub>                              | 2 x G (s)<br>2 x -56.1 <sup>1</sup>                              | -607.78 <sup>4</sup>                            | 2 x -156.8                           | -1033.58                                            |
| (NH <sub>4</sub> ) <sub>2</sub> SO <sub>4</sub>               | 2 x NH <sub>3</sub> (g)<br>2 x -46.11 <sup>1</sup>               | -813.989 <sup>1</sup>                           | 2 x -145.35                          | -1196.9                                             |
| (NH <sub>3</sub> OH) <sub>2</sub> SO <sub>4</sub>             | 2 x NH <sub>2</sub> OH (s)<br>2 x -114.8 <sup>1</sup>            | -813.989 <sup>1</sup>                           | 2 x -78.20                           | -1200.0                                             |
| (NH <sub>4</sub> ) <sub>2</sub> C <sub>2</sub> O <sub>4</sub> | 2 x NH <sub>3</sub> (g)<br>2 x -46.11 <sup>1</sup>               | -827.2 <sup>1</sup>                             | 2 x -145.35                          | -1210.12                                            |

<sup>1</sup>Value taken from NBS tables. <sup>2</sup>Value for  $\Delta_f H_m^\circ$  (g) calculated using CBS-4M;  $\Delta_{\text{sub}} H_m^\circ$  estimated based on value for the acid of TKX-50 estimated using Keshavarz, M.H. (2021). Energetic Materials Designing Bench (EMDB), Version 2.0 (129 kJ·mol<sup>-1</sup>). <sup>3</sup>Value taken from Dorofeeva, O.V.; Ryzhova, O.N.; Sinditskii, V.P. Enthalpy of formation of guanidine and its amino and nitro derivatives. *Struct. Chem.* **2015**, 26, 1629-1640. <sup>4</sup>Value for  $\Delta_f H_m^\circ$  (g) calculated using CBS-4M. <sup>5</sup>Value for  $\Delta_f H_m^\circ$  (g) calculated using CBS-4M;  $\Delta_{\text{sub}} H_m^\circ$  estimated using RoseBoom® (117.1 kJ·mol<sup>-1</sup>). <sup>6</sup>Value for  $\Delta_f H_m^\circ$  (g) calculated using CBS-4M;  $\Delta_{\text{sub}} H_m^\circ$  estimated using Keshavarz, M.H. (2021). Energetic Materials Designing Bench (EMDB), Version 2.0 (129 kJ·mol<sup>-1</sup>).



**Table S7.** Computational results on 2:1 salts at CBS-QB3 level of theory.

| Compound                                                      | $\Delta_f H^\circ$ base (kJ·mol <sup>-1</sup> )                  | $\Delta_f H^\circ$ acid (kJ·mol <sup>-1</sup> ) | $\Delta_r H$ (kJ·mol <sup>-1</sup> ) | $\Delta_f H^\circ$ (s) salt (kJ·mol <sup>-1</sup> ) |
|---------------------------------------------------------------|------------------------------------------------------------------|-------------------------------------------------|--------------------------------------|-----------------------------------------------------|
| TKX-50                                                        | 2 x NH <sub>2</sub> OH (s)<br>2 x -114.8 <sup>1</sup>            | +542.5 <sup>2</sup>                             | 2 x -78.2                            | +156.5                                              |
| TKX-50                                                        | 2 x NH <sub>2</sub> OH (s)<br>2 x -114.8 <sup>1</sup>            | +554.3 <sup>3</sup>                             | 2 x -78.2                            | +168.3                                              |
| GZT                                                           | 2 x G (s)<br>2 x -56.1 <sup>1</sup>                              | +800 <sup>5</sup>                               | 2 x -156.8                           | +374.2                                              |
| (AG) <sub>2</sub> AzT                                         | 2 x AG (s)<br>2 x +58.5 <sup>4</sup>                             | +800 <sup>5</sup>                               | 2 x -163.1                           | +590.8                                              |
| (DAG) <sub>2</sub> AzT                                        | 2 x DAG (s)<br>2 x +167.4 <sup>4</sup>                           | +800 <sup>5</sup>                               | 2 x 150.6                            | +833.6                                              |
| (TAG) <sub>2</sub> AzT                                        | 2 x TAG (s)<br>2 x +287.7 <sup>4</sup>                           | +800 <sup>5</sup>                               | 2 x -163.8                           | +1047.8                                             |
| (NH <sub>4</sub> ) <sub>2</sub> AzT                           | 2 x NH <sub>3</sub> (g)<br>2 x -46.11 <sup>1</sup>               | +800 <sup>5</sup>                               | 2 x -145.35                          | +417.08                                             |
| (N <sub>2</sub> H <sub>5</sub> ) <sub>2</sub> AzT             | 2 x N <sub>2</sub> H <sub>4</sub> (l)<br>2 x +50.63 <sup>1</sup> | +800 <sup>5</sup>                               | 2 x -128.1                           | +645.06                                             |
| (G) <sub>2</sub> CO <sub>3</sub>                              | 2 x G (s)<br>2 x -56.1 <sup>1</sup>                              | -618.83 <sup>2</sup>                            | 2 x -156.8                           | -1044.6                                             |
| (NH <sub>4</sub> ) <sub>2</sub> SO <sub>4</sub>               | 2 x NH <sub>3</sub> (g)<br>2 x -46.11 <sup>1</sup>               | -813.989 <sup>1</sup>                           | 2 x -145.35                          | -1196.9                                             |
| (NH <sub>3</sub> OH) <sub>2</sub> SO <sub>4</sub>             | 2 x NH <sub>2</sub> OH (s)<br>2 x -114.8 <sup>1</sup>            | -813.989 <sup>1</sup>                           | 2 x -78.2                            | -1200.0                                             |
| (NH <sub>4</sub> ) <sub>2</sub> C <sub>2</sub> O <sub>4</sub> | 2 x NH <sub>3</sub> (g)<br>2 x -46.11 <sup>1</sup>               | -827.2 <sup>1</sup>                             | 2 x -145.35                          | -1210.2                                             |

<sup>1</sup>Value taken from NBS tables. <sup>2</sup>Value for  $\Delta_f H_m^\circ$ (g) calculated using CBS-QB3;  $\Delta_{\text{sub}} H_m^\circ$  for TKX-50 estimated using Keshavarz, M.H. (2021). Energetic Materials Designing Bench (EMDB), Version 2.0 (129 kJ·mol<sup>-1</sup>). <sup>3</sup>Value for  $\Delta_f H_m^\circ$ (g) calculated using CBS-4M;  $\Delta_{\text{sub}} H_m^\circ$  estimated using RoseBoom® (117.1 kJ·mol<sup>-1</sup>). <sup>4</sup>Value taken from Dorofeeva, O.V.; Ryzhova, O.N.; Sinditskii, V.P. Enthalpy of formation of guanidine and its amino and nitro derivatives. *Struct. Chem.* **2015**, *26*, 1629-1640. <sup>5</sup>Value for  $\Delta_f H_m^\circ$ (g) calculated using CBS-4M. <sup>6</sup>Value for  $\Delta_f H_m^\circ$ (g) calculated using CBS-QB3;  $\Delta_{\text{sub}} H_m^\circ$  estimated based on value for the acid of TKX-50 estimated using Keshavarz, M.H. (2021). Energetic Materials Designing Bench (EMDB), Version 2.0 (129 kJ·mol<sup>-1</sup>). <sup>6</sup>Value for  $\Delta_f H_m^\circ$ (g) calculated using CBS-QB3.

**Table S8.** Computational results on 2:1 adducts at CBS-4M level theory.

| Compound                                                                                                                        | $\Delta_{\text{trs}}H^\circ$ base<br>(kJ·mol <sup>-1</sup> ) | $\Delta_{\text{trs}}H^\circ$ acid<br>(kJ·mol <sup>-1</sup> ) | $\Delta_fH^\circ$ (g) Adduct<br>(kJ·mol <sup>-1</sup> ) | $\Delta_fH^\circ$ (s) Adduct<br>(kJ·mol <sup>-1</sup> ) |
|---------------------------------------------------------------------------------------------------------------------------------|--------------------------------------------------------------|--------------------------------------------------------------|---------------------------------------------------------|---------------------------------------------------------|
| 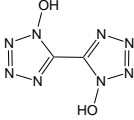<br>NH <sub>2</sub> OH•<br>•NH <sub>2</sub> OH | $2 \times \Delta_{\text{sub}}H^\circ = 64.2^1$               | 129 <sup>3</sup>                                             | +547.8                                                  | +290.4                                                  |
| <br>NH <sub>2</sub> OH•<br>•NH <sub>2</sub> OH | $2 \times \Delta_{\text{sub}}H^\circ = 64.2^1$               | 117.1 <sup>5</sup>                                           | +547.8                                                  | +302.3                                                  |
| G•H <sub>2</sub> AzT•G                                                                                                          | $2 \times \Delta_{\text{sub}}H^\circ = 78.3^2$               | 129 <sup>4</sup>                                             | +806.82                                                 | +521.2                                                  |
| AG•H <sub>2</sub> AzT•AG                                                                                                        | $2 \times \Delta_{\text{sub}}H^\circ = 65.4^2$               | 129 <sup>4</sup>                                             | +999.7                                                  | +739.9                                                  |
| DAG•H <sub>2</sub> AzT•DAG                                                                                                      | $2 \times \Delta_{\text{sub}}H^\circ = 74.0^2$               | 129 <sup>4</sup>                                             | +1298.23                                                | +1021.23                                                |
| TAG•H <sub>2</sub> AzT•                                                                                                         | $2 \times \Delta_{\text{sub}}H^\circ = 78.2^2$               | 129 <sup>4</sup>                                             | +1485.20                                                | +1199.6                                                 |
| NH <sub>3</sub> •H <sub>2</sub> AzT•NH <sub>3</sub>                                                                             | 0                                                            | 129 <sup>4</sup>                                             | +739.83                                                 | +610.8                                                  |
| N <sub>2</sub> H <sub>4</sub> •H <sub>2</sub> AzT•N <sub>2</sub> H <sub>4</sub>                                                 | $2 \times \Delta_{\text{vap}}H^\circ = 44.5^1$               | 129 <sup>4</sup>                                             | +1012.40                                                | +794.4                                                  |
| G•H <sub>2</sub> CO <sub>3</sub> •G                                                                                             | $2 \times \Delta_{\text{sub}}H^\circ = 78.3^2$               | 43.99 <sup>1</sup>                                           | -688.51                                                 | -889.1                                                  |
| NH <sub>3</sub> •H <sub>2</sub> SO <sub>4</sub> •NH <sub>3</sub>                                                                | 0                                                            | 56 <sup>6</sup>                                              | -892.97                                                 | -948.97                                                 |
| NH <sub>2</sub> OH•H <sub>2</sub> SO <sub>4</sub> •NH <sub>2</sub> OH                                                           | $2 \times \Delta_{\text{sub}}H^\circ = 64.2^1$               | 56 <sup>6</sup>                                              | -891.69                                                 | -1076.09                                                |
| NH <sub>3</sub> •H <sub>2</sub> C <sub>2</sub> O <sub>4</sub> •NH <sub>3</sub>                                                  | 0                                                            | 93 <sup>1</sup>                                              | -888.43                                                 | -981.43                                                 |

<sup>1</sup>Value taken from Acree Jr., W.; Chickos, J.S. Enthalpies of Sublimation of Organic and Organometallic Compounds. 1910 - 2001. Part 1. C1–C10. *J. Phys. Chem. Ref. Data* **2002**, 31, 537–698. <sup>2</sup>Value taken from Dorofeeva, O.V.; Ryzhova, O.N.; Sinditskii, V.P. Enthalpy of formation of guanidine and its amino and nitro derivatives. *Struct. Chem.* **2015**, 26, 1629–1640. <sup>3</sup>Value for  $\Delta_{\text{sub}}H^\circ_{\text{m}}$  estimated using Keshavarz, M.H. (2021). Energetic Materials Designing Bench (EMDB), Version 2.0. <sup>4</sup>Value for  $\Delta_{\text{sub}}H^\circ_{\text{m}}$  estimated using Keshavarz, M.H. (2021). Energetic Materials Designing Bench (EMDB), Version 2.0 for acid of TKX-50 was used. <sup>5</sup>Value for  $\Delta_{\text{sub}}H^\circ_{\text{m}}$  estimated using RoseBoom®. <sup>6</sup>Value taken from [https://www.chemicalbook.com/ProductMSDSDetailCB9675634\\_EN.htm](https://www.chemicalbook.com/ProductMSDSDetailCB9675634_EN.htm).

**Table S9.** Computational results on 2:1 adducts at CBS-QB3 level of theory.

| Compound                                                                                                                        | $\Delta_{\text{trs}}H_{\text{m}}^{\circ}$ base<br>(kJ·mol <sup>-1</sup> ) | $\Delta_{\text{trs}}H_{\text{m}}^{\circ}$ acid<br>(kJ·mol <sup>-1</sup> ) | $\Delta_{\text{f}}H^{\circ}$ (g) Adduct<br>(kJ·mol <sup>-1</sup> ) | $\Delta_{\text{f}}H^{\circ}$ (s) Adduct<br>(kJ·mol <sup>-1</sup> ) |
|---------------------------------------------------------------------------------------------------------------------------------|---------------------------------------------------------------------------|---------------------------------------------------------------------------|--------------------------------------------------------------------|--------------------------------------------------------------------|
| 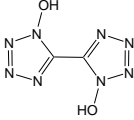<br>NH <sub>2</sub> OH•<br>•NH <sub>2</sub> OH | $2 \times \Delta_{\text{sub}}H^{\circ} = 64.2^1$                          | 129 <sup>3</sup>                                                          | +547.8                                                             | +290.40                                                            |
| <br>NH <sub>2</sub> OH•<br>•NH <sub>2</sub> OH | $2 \times \Delta_{\text{sub}}H^{\circ} = 64.2^1$                          | 117.1 <sup>5</sup>                                                        | +547.8                                                             | +302.3                                                             |
| G•H <sub>2</sub> AzT•G                                                                                                          | $2 \times \Delta_{\text{sub}}H^{\circ} = 78.3^2$                          | 129 <sup>4</sup>                                                          | +806.82                                                            | +521.2                                                             |
| AG•H <sub>2</sub> AzT•AG                                                                                                        | $2 \times \Delta_{\text{sub}}H^{\circ} = 65.4^2$                          | 129 <sup>4</sup>                                                          | +999.7                                                             | +739.9                                                             |
| DAG•H <sub>2</sub> AzT•DAG                                                                                                      | $2 \times \Delta_{\text{sub}}H^{\circ} = 74.0^2$                          | 129 <sup>4</sup>                                                          | +1298.23                                                           | +1021.23                                                           |
| TAG•H <sub>2</sub> AzT•                                                                                                         | $2 \times \Delta_{\text{sub}}H^{\circ} = 78.2^2$                          | 129 <sup>4</sup>                                                          | +1485.2                                                            | +1199.6                                                            |
| NH <sub>3</sub> •H <sub>2</sub> AzT•NH <sub>3</sub>                                                                             | 0                                                                         | 129 <sup>4</sup>                                                          | +739.83                                                            | +610.8                                                             |
| N <sub>2</sub> H <sub>4</sub> •H <sub>2</sub> AzT•N <sub>2</sub> H <sub>4</sub>                                                 | $2 \times \Delta_{\text{vap}}H^{\circ} = 44.5^1$                          | 129 <sup>4</sup>                                                          | +1012.4                                                            | +794.4                                                             |
| G•H <sub>2</sub> CO <sub>3</sub> •G                                                                                             | $2 \times \Delta_{\text{sub}}H^{\circ} = 78.3^2$                          | 43.99 <sup>1</sup>                                                        | -688.51                                                            | -889.1                                                             |
| NH <sub>3</sub> •H <sub>2</sub> SO <sub>4</sub> •NH <sub>3</sub>                                                                | 0                                                                         | 56 <sup>6</sup>                                                           | -892.97                                                            | -948.97                                                            |
| NH <sub>2</sub> OH•H <sub>2</sub> SO <sub>4</sub> •NH <sub>2</sub> OH                                                           | $2 \times \Delta_{\text{sub}}H^{\circ} = 64.2^1$                          | 56 <sup>6</sup>                                                           | -891.69                                                            | -1076.09                                                           |
| NH <sub>3</sub> •H <sub>2</sub> C <sub>2</sub> O <sub>4</sub> •NH <sub>3</sub>                                                  | 0                                                                         | 93 <sup>1</sup>                                                           | -888.43                                                            | -981.43                                                            |

<sup>1</sup>Value taken from Acree Jr., W.; Chickos, J.S. Enthalpies of Sublimation of Organic and Organometallic Compounds. 1910 - 2001. *J. Phys. Chem. Ref. Data* **2002**, 31, 537–698. <sup>2</sup>Value taken from Dorofeeva, O.V.; Ryzhova, O.N.; Sinditskii, V.P. Enthalpy of formation of guanidine and its amino and nitro derivatives. *Struct. Chem.* **2015**, 26, 1629-1640. <sup>3</sup>Value for  $\Delta_{\text{sub}}H_{\text{m}}^{\circ}$  estimated using Keshavarz, M.H. (2021). Energetic Materials Designing Bench (EMDB), Version 2.0. <sup>4</sup>Value for  $\Delta_{\text{sub}}H_{\text{m}}^{\circ}$  estimated using Keshavarz, M.H. (2021). Energetic Materials Designing Bench (EMDB), Version 2.0 for acid of TKX-50 was used. <sup>5</sup>Value for  $\Delta_{\text{sub}}H_{\text{m}}^{\circ}$  estimated using RoseBoom®. <sup>6</sup>Value taken from [https://www.chemicalbook.com/ProductMSDSDetailCB9675634\\_EN.htm](https://www.chemicalbook.com/ProductMSDSDetailCB9675634_EN.htm).
